# Supplementary material for: A novel mutual information-based Boolean network inference method from time-series gene expression data
Source: PubMed Central journal article supplement (PMC5298315; doi:10.1371/journal.pone.0171097), 2017-02-08
Supplement: pone.0171097.s001.pdf [file pone.0171097.s001.pdf]

```

function [V, A] = createRBN_BarabasiAlbert(N, e, d)
//N: The desired number of nodes
//e: The number of initial nodes
//d: The number of interactions to be added at each step
//V, A: A set of nodes V and a set of links A of the resulting network generated by the Barabási-Albert model

V←{0, 1, ..., e-1};
A←∅;
for i:=0 to e-2
  for j:=i+1 to e-1
    if (randNumber(0,1) < 0.5) // randNumber(0,1) returns a real number chosen from 0 to 1 uniformly at
random
      A←A∪{(i, j)};
    else
      A←A∪{(j, i)};
    endif
  endfor
endfor

for i:= e to N-1
  for j:=0 to d-1
    do
      v = selection(V); //v is chosen with a probability proportional to its degree.
      if (randNumber(0,1) < 0.5)
        vSrc← i, vDst← v;
      else
        vSrc← v, vDst← i;
      endif
      until ((vSrc, vDst)∉ A);
      A←A∪{(vSrc, vDst)};
    endfor
    V←V∪{i};
  endfor
return [V, A];
end

```

**S1 Figure. Pseudo-code of the Barabási-Albert model used in our simulation.** The desired number of nodes ( $N$ ), the number of nodes in the seed network ( $e$ ), and the number of edges to be added at each iteration ( $d$ ) are given as parameters. A small seed network  $G(V, A)$  consisting of  $V = \{v_1, v_2, \dots, v_e\}$  and  $A = \{(v_i, v_j) \mid i, j = 1, 2, \dots, e, \text{ and } i \neq j\}$  is randomly specified. At each iteration, a node  $v$  and  $d$  different interactions are newly inserted into the graph where the probability of connecting a new node and an existing node is proportional to the connectivity of the latter node. This process is repeated until  $|V| = N$  and a resultant network is returned as the output.
