# Supplementary material for: A novel mutual information-based Boolean network inference method from time-series gene expression data
Source: PubMed Central journal article supplement (PMC5298315; doi:10.1371/journal.pone.0171097), 2017-02-08
Supplement: pone.0171097.s003.pdf [file pone.0171097.s003.pdf]

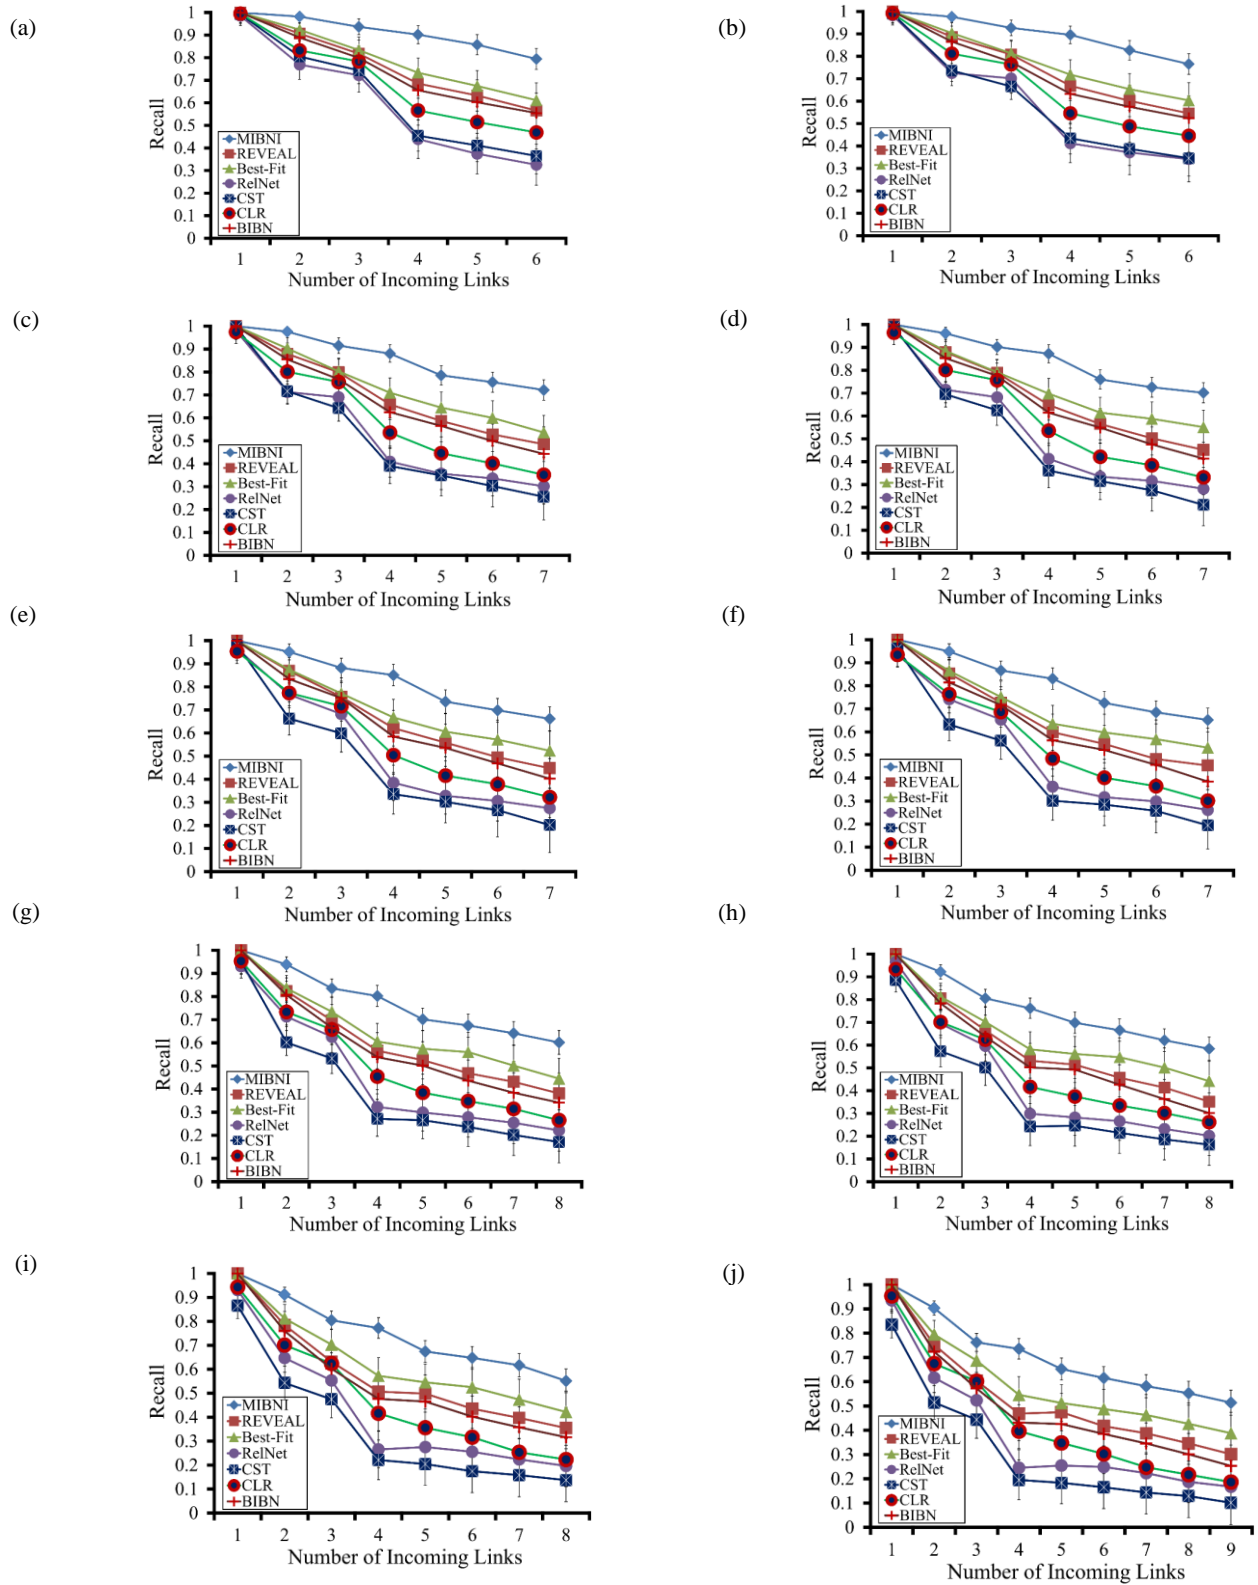

**S3 Figure. Comparison of recall between MIBNI and other methods in BA random network groups of different sizes.** (a)-(j) Recall results of network groups with  $|V| = 10, 20, \dots, 100$ , respectively. The number of links ( $|A|$ ) was set to  $2 \cdot |V|$  in this work, and 30 BA random networks were examined in each subfigure.
