# Supplementary material for: A novel mutual information-based Boolean network inference method from time-series gene expression data
Source: PubMed Central journal article supplement (PMC5298315; doi:10.1371/journal.pone.0171097), 2017-02-08
Supplement: pone.0171097.s005.pdf [file pone.0171097.s005.pdf]

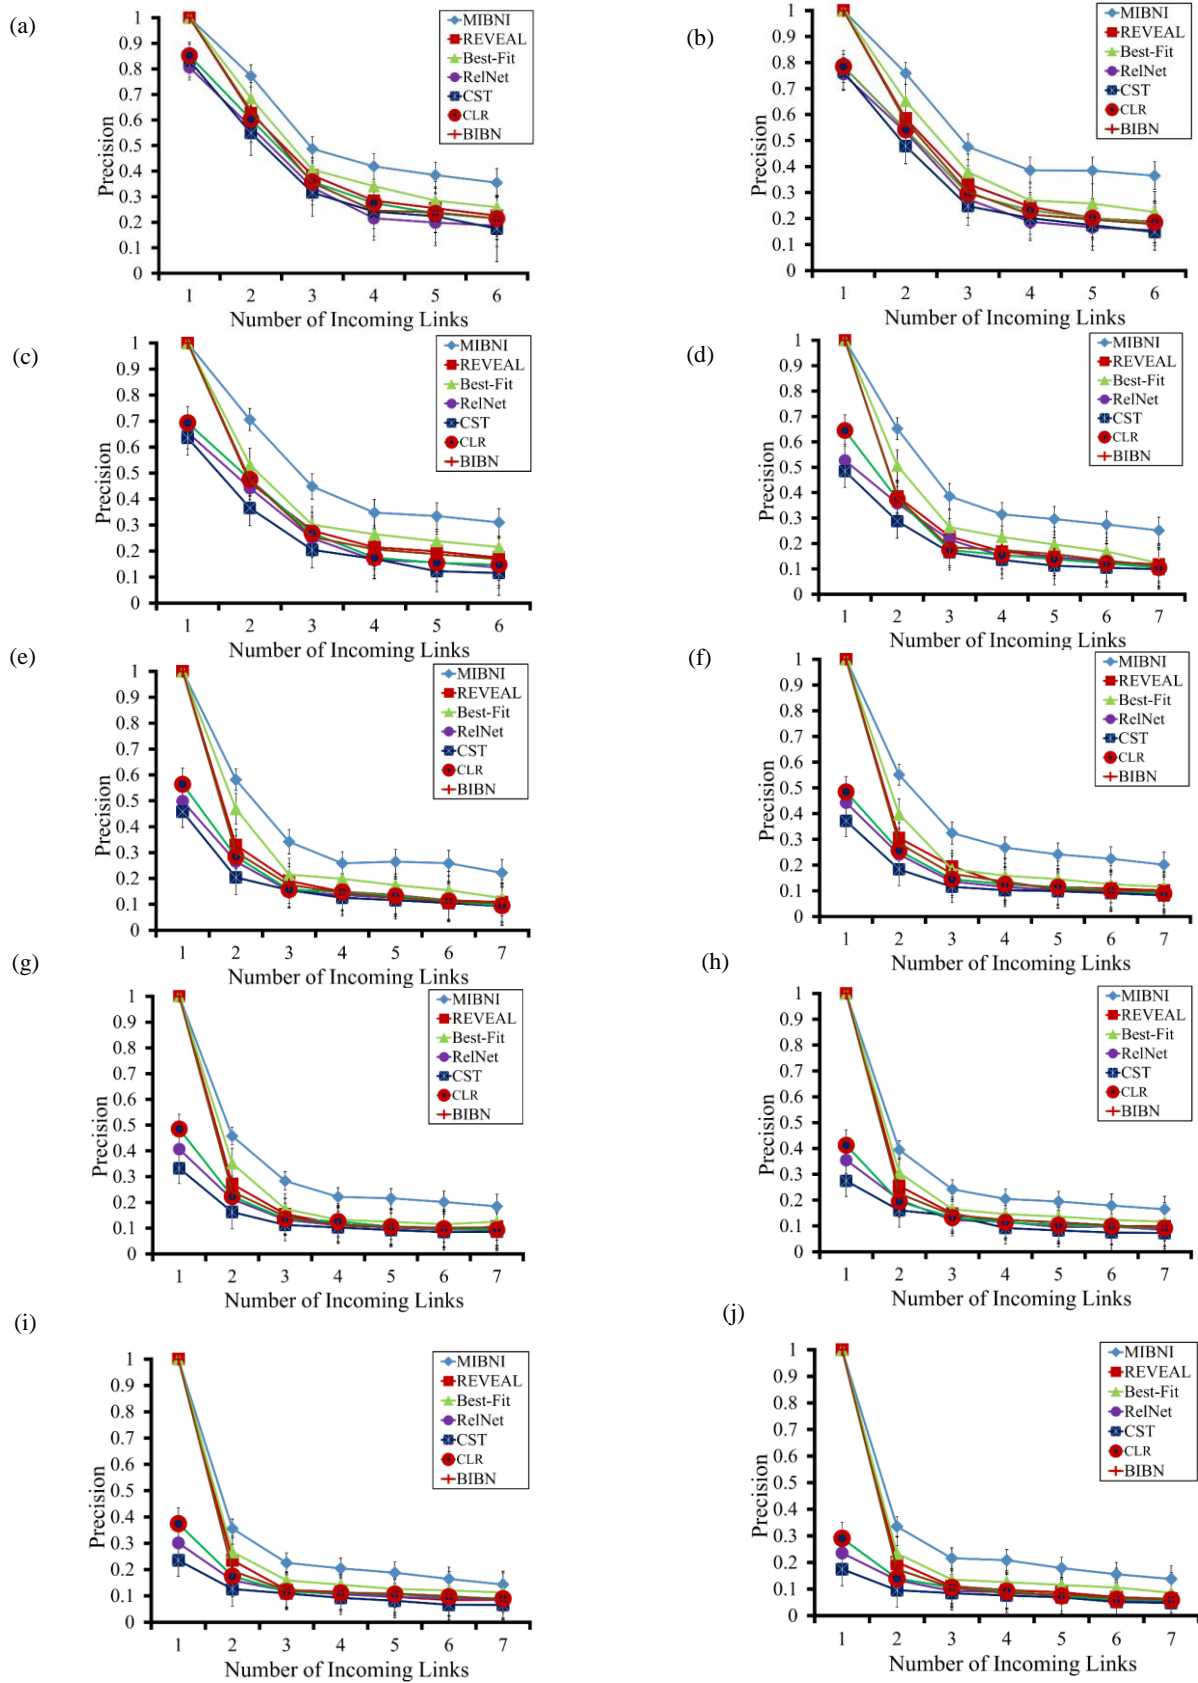

**S5 Figure. Comparison of precision between MIBNI and other methods in GNW random network groups of different sizes. (a)-(j)** Precision results of network groups with  $|V| = 10, 20, \dots, 100$ , respectively. In each subfigure, 30 GNW random networks were examined.
