# Supplementary material for: A novel mutual information-based Boolean network inference method from time-series gene expression data
Source: PubMed Central journal article supplement (PMC5298315; doi:10.1371/journal.pone.0171097), 2017-02-08
Supplement: pone.0171097.s008.pdf [file pone.0171097.s008.pdf]

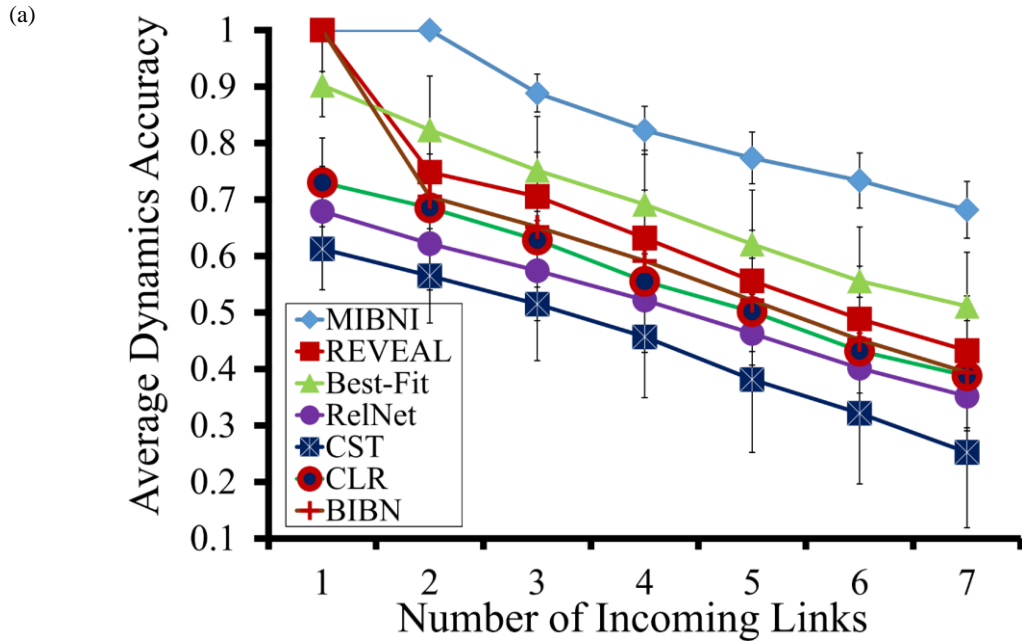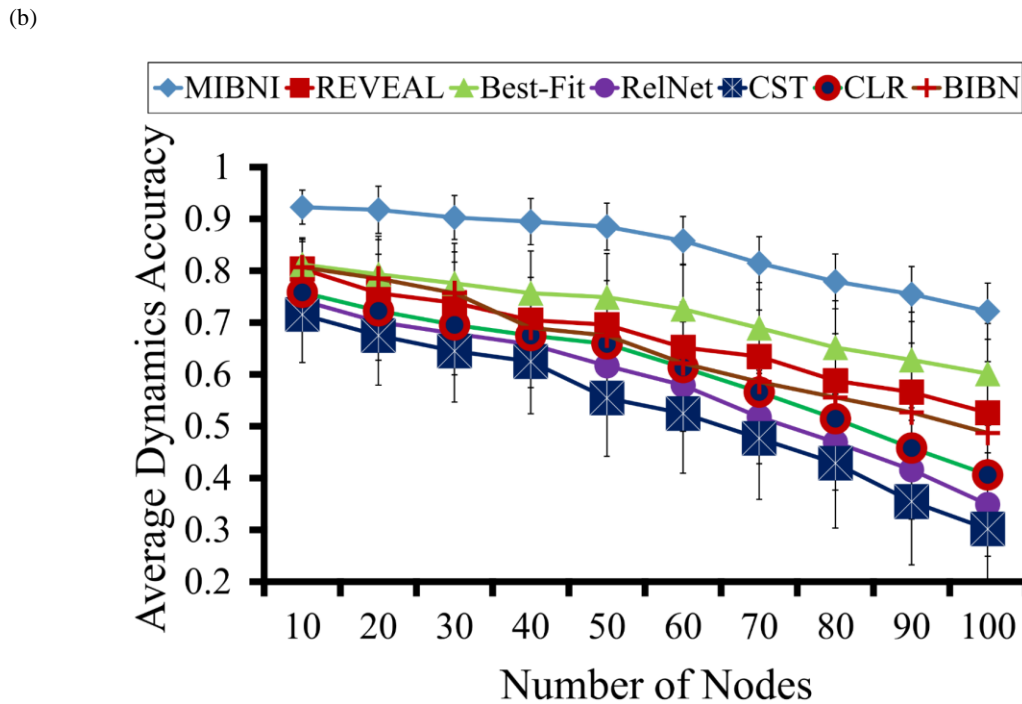

**S8 Figure. Comparison of dynamic accuracies between MIBNI and other methods in GNW random networks.** (a) Results versus the numbers of incoming links. A total of 300 GNW random networks with different network sizes ( $|V| = 10, 20, \dots, 100$ ) were used as target networks, and 16,500 nodes in those networks were classified according to the number of incoming links. (b) Results versus the network sizes. For each different number of nodes, 30 GNW random networks were examined. In each figure, the maximum time step was set to  $|V| + 10$  in generating artificial gene expression data.
