# Supplementary material for: A novel mutual information-based Boolean network inference method from time-series gene expression data
Source: PubMed Central journal article supplement (PMC5298315; doi:10.1371/journal.pone.0171097), 2017-02-08
Supplement: pone.0171097.s010.pdf [file pone.0171097.s010.pdf]

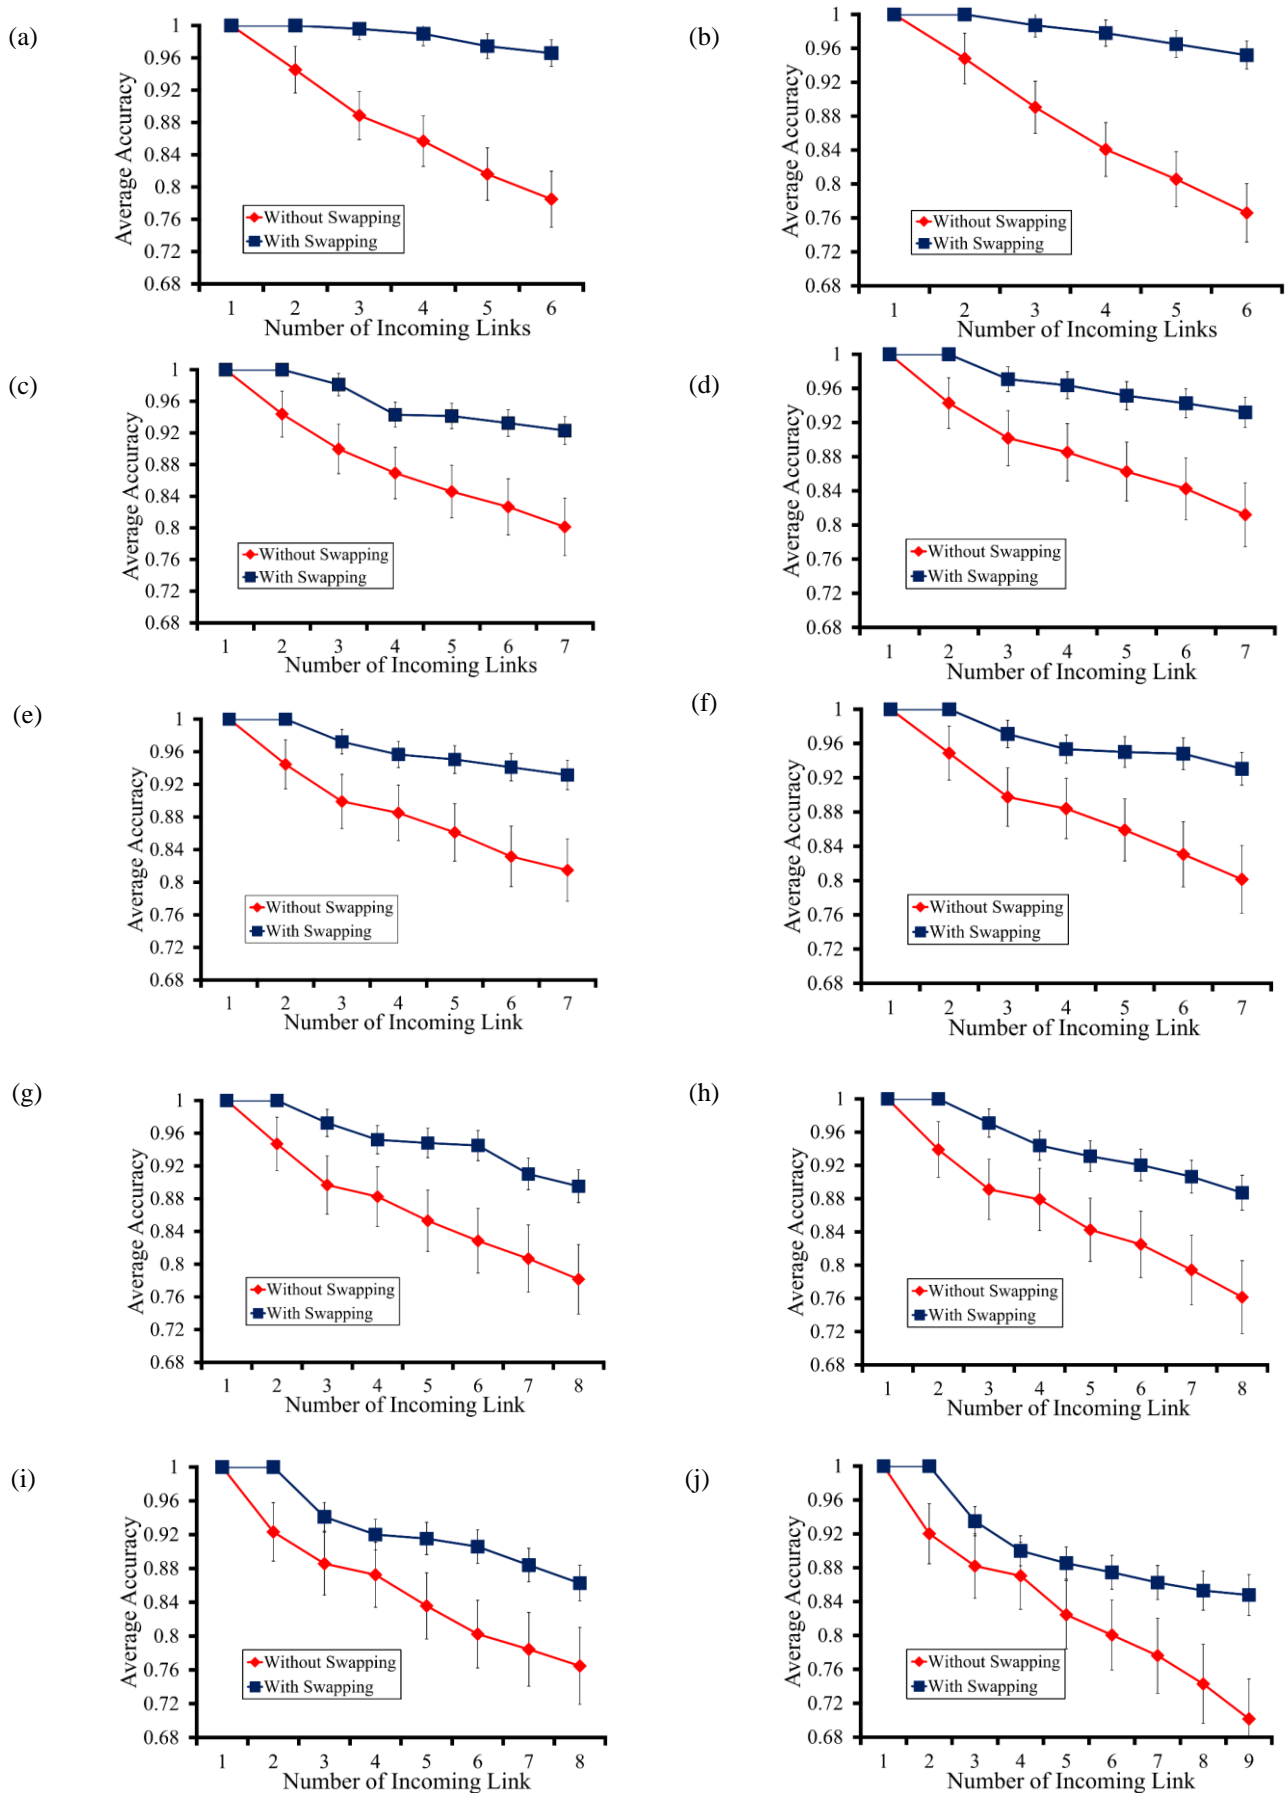

**S10 Figure. Performance improvement by SWAP subroutine in BA random network groups of different sizes. (a)-(j)** Results of network groups with  $|V| = 10, 20, \dots, 100$ , respectively. The number of links ( $|A|$ ) was set to  $2 \cdot |V|$ , and 30 BA random networks were examined in each subfigure. The Y-axis values show changes in the average dynamic accuracies versus the number of incoming links.
