# Supplementary material for: A novel mutual information-based Boolean network inference method from time-series gene expression data
Source: PubMed Central journal article supplement (PMC5298315; doi:10.1371/journal.pone.0171097), 2017-02-08
Supplement: pone.0171097.s011.pdf [file pone.0171097.s011.pdf]

(a)

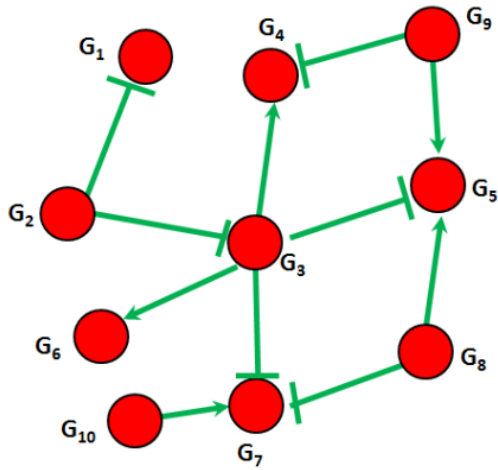

(b)

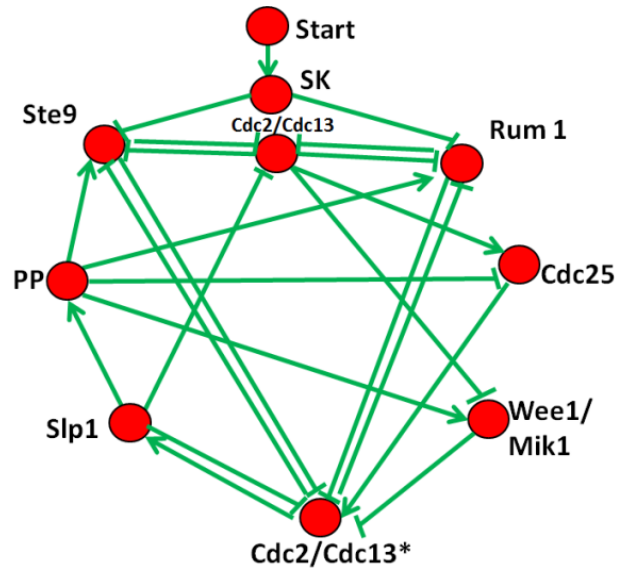

**S11 Figure. Structures of two real regulatory networks.** (a) The *E. coli* gene regulatory network consisting of 10 genes and 11 interactions. (b) The fission yeast cell cycle network consisting of 10 genes and 23 interactions. In the figure, the arrows and barred lines represent positive and negative interactions, respectively.
