# Supplementary material for: A novel mutual information-based Boolean network inference method from time-series gene expression data
Source: PubMed Central journal article supplement (PMC5298315; doi:10.1371/journal.pone.0171097), 2017-02-08
Supplement: pone.0171097.s013.pdf [file pone.0171097.s013.pdf]

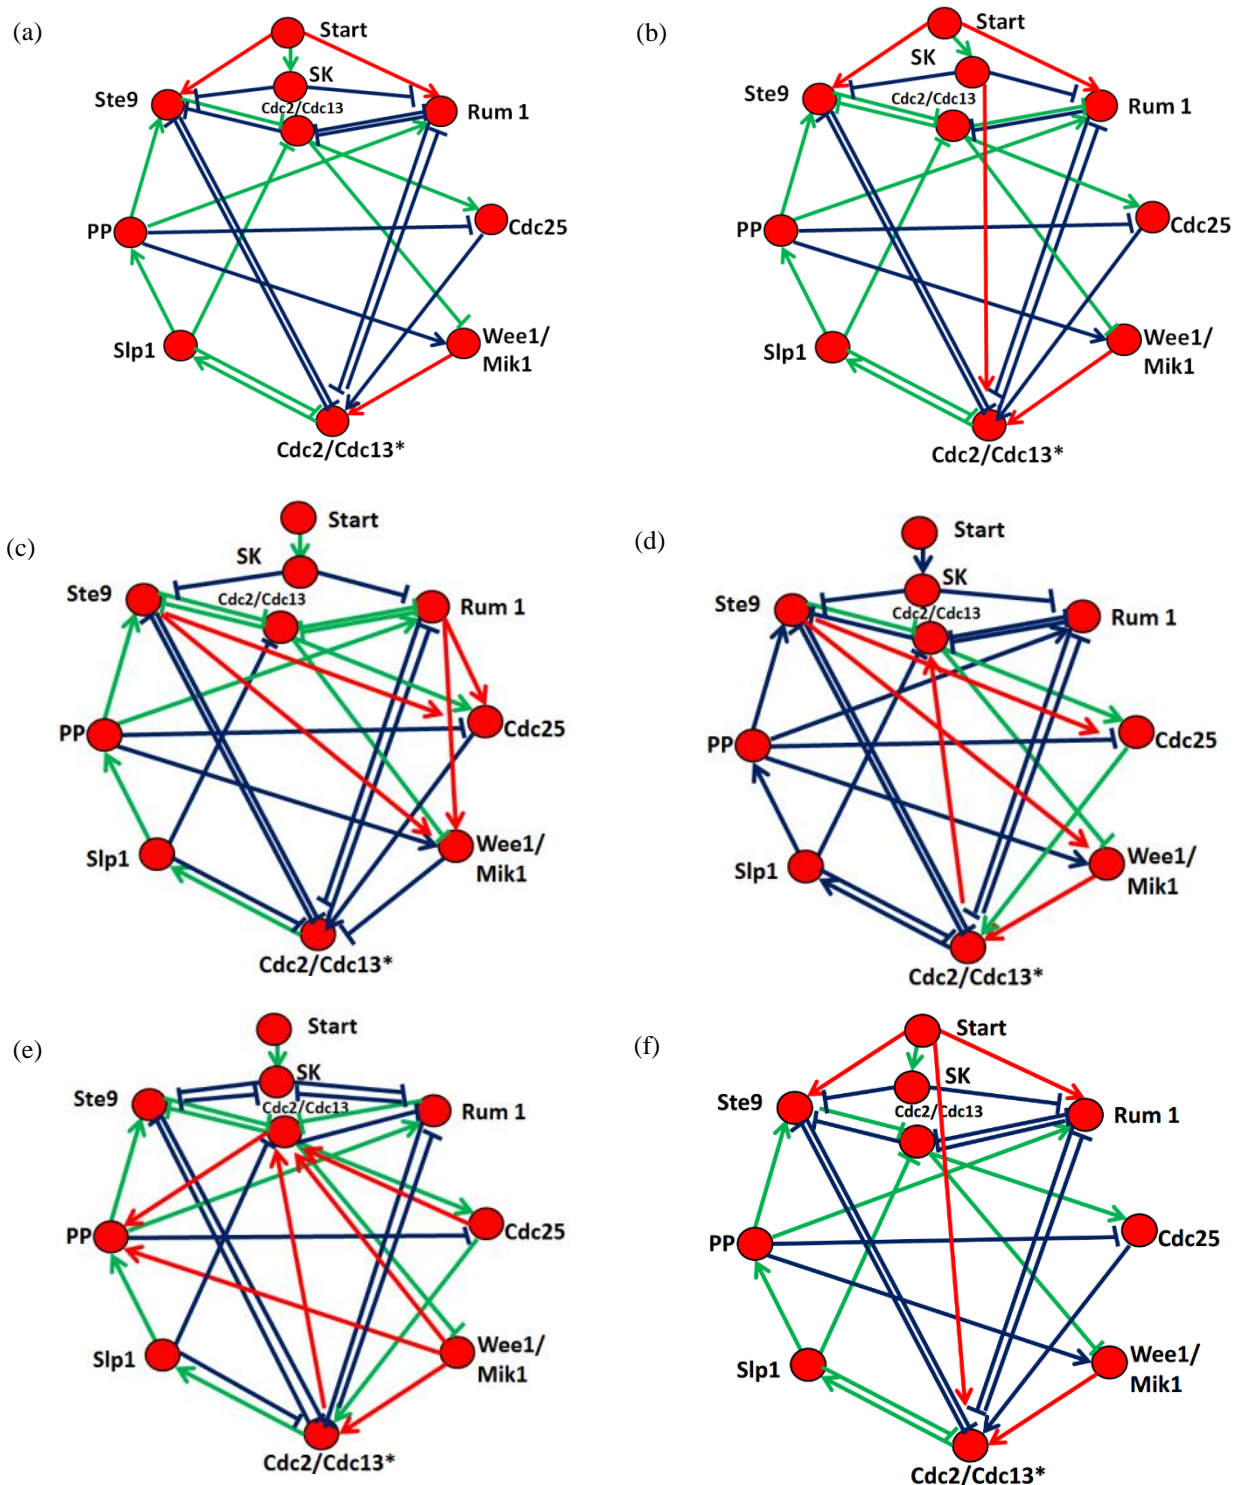

**S13 Figure. Inference performance of REVEAL, Best-Fit, CST, RelNet, CLR, and BIBN with respect to fission yeast cell cycle network.** The green, red, and blue interactions denote true positive, false positive, and false negative predictions, respectively. (a) Inference results of REVEAL. The results showed 10 true positives, 3 false positives, and 12 false negatives. The structural and dynamics accuracies were 0.8529 and 0.9200, respectively. (b) Inference results of Best-Fit. The results showed 12 true positives, 4 false positives, and 10 false negatives. The structural and dynamics accuracies were 0.8585 and 0.8800, respectively. (c) Inference results of CST. The results showed 11 true positives, 4 false positives, and 12 false negatives. The structural and dynamics accuracies were 0.8431 and 0.8600, respectively. (d) Inference results of RelNet. The results showed 4 true positives, 4 false positives, and 18 false negatives. The structural and dynamics accuracies were 0.7962 and 0.8700, respectively. (e) Inference results of CLR. The results showed 11 true positives, 12 false positives, and 12 false negatives. The structural and dynamics accuracies were 0.7647 and 0.8400, respectively. (f) Inference results of BIBN. The results showed 10 true positives, 4 false positives, and 12 false negatives. The structural and dynamics accuracies were 0.8461 and 0.9000, respectively.
