# Supplementary material for: A novel mutual information-based Boolean network inference method from time-series gene expression data
Source: PubMed Central journal article supplement (PMC5298315; doi:10.1371/journal.pone.0171097), 2017-02-08
Supplement: pone.0171097.s014.pdf [file pone.0171097.s014.pdf]

**S1 Table.** The number of nodes and the range of the number of edges in GNW random networks.

| <b>Number of nodes</b> | <b>Range of the number of edges</b> |
|------------------------|-------------------------------------|
| 10                     | 27-29                               |
| 20                     | 40-58                               |
| 30                     | 55-76                               |
| 40                     | 75-86                               |
| 50                     | 93-114                              |
| 60                     | 100-137                             |
| 70                     | 134-150                             |
| 80                     | 151-169                             |
| 90                     | 177-194                             |
| 100                    | 188-204                             |
