# Supplementary material for: A novel mutual information-based Boolean network inference method from time-series gene expression data
Source: PubMed Central journal article supplement (PMC5298315; doi:10.1371/journal.pone.0171097), 2017-02-08
Supplement: pone.0171097.s016.pdf [file pone.0171097.s016.pdf]

**S3 Table.** Boolean gene expression dataset of the *E. coli* gene regulatory network converted by k-means algorithm

| Time | G <sub>1</sub> | G <sub>2</sub> | G <sub>3</sub> | G <sub>4</sub> | G <sub>5</sub> | G <sub>6</sub> | G <sub>7</sub> | G <sub>8</sub> | G <sub>9</sub> | G <sub>10</sub> |
|------|----------------|----------------|----------------|----------------|----------------|----------------|----------------|----------------|----------------|-----------------|
| 1    | 1              | 0              | 1              | 1              | 0              | 0              | 1              | 0              | 0              | 0               |
| 2    | 1              | 0              | 1              | 1              | 0              | 0              | 1              | 0              | 0              | 0               |
| 3    | 1              | 0              | 1              | 1              | 0              | 0              | 1              | 0              | 0              | 0               |
| 4    | 1              | 0              | 1              | 1              | 0              | 0              | 0              | 0              | 0              | 1               |
| 5    | 1              | 1              | 1              | 1              | 0              | 1              | 0              | 1              | 0              | 1               |
| 6    | 0              | 1              | 0              | 1              | 1              | 1              | 0              | 1              | 1              | 1               |
| 7    | 0              | 1              | 0              | 1              | 1              | 1              | 0              | 1              | 1              | 1               |
| 8    | 0              | 1              | 0              | 1              | 1              | 1              | 0              | 1              | 1              | 1               |
| 9    | 0              | 1              | 0              | 1              | 1              | 1              | 0              | 1              | 1              | 1               |
| 10   | 0              | 1              | 0              | 1              | 1              | 1              | 0              | 1              | 1              | 1               |
| 11   | 0              | 1              | 0              | 1              | 1              | 1              | 0              | 1              | 1              | 1               |
| 12   | 0              | 1              | 0              | 0              | 1              | 1              | 0              | 1              | 1              | 1               |
| 13   | 0              | 1              | 0              | 0              | 1              | 1              | 0              | 1              | 1              | 1               |
| 14   | 0              | 1              | 0              | 0              | 1              | 1              | 0              | 1              | 1              | 1               |
| 15   | 0              | 1              | 0              | 0              | 1              | 1              | 0              | 1              | 1              | 1               |
| 16   | 0              | 1              | 0              | 0              | 1              | 1              | 0              | 1              | 1              | 1               |
| 17   | 0              | 1              | 0              | 0              | 1              | 0              | 0              | 1              | 1              | 1               |
| 18   | 0              | 1              | 0              | 0              | 1              | 0              | 0              | 1              | 1              | 1               |
| 19   | 0              | 1              | 0              | 0              | 1              | 0              | 0              | 1              | 1              | 1               |
| 20   | 0              | 1              | 0              | 0              | 1              | 0              | 0              | 1              | 1              | 1               |
| 21   | 0              | 1              | 0              | 0              | 1              | 0              | 0              | 1              | 1              | 1               |
