# Supplementary material for: A novel mutual information-based Boolean network inference method from time-series gene expression data
Source: PubMed Central journal article supplement (PMC5298315; doi:10.1371/journal.pone.0171097), 2017-02-08
Supplement: pone.0171097.s017.pdf [file pone.0171097.s017.pdf]

**S4 Table.** Boolean gene expression dataset of the fission yeast cell cycle

| <b>Time</b> | <b>Start</b> | <b>SK</b> | <b>Cdc2/Cdc13</b> | <b>Ste9</b> | <b>Rum1</b> | <b>Slp1</b> | <b>Cdc2/Cdc13*</b> | <b>Week1Mik1</b> | <b>Cdc25</b> | <b>PP</b> | <b>Phase</b> |
|-------------|--------------|-----------|-------------------|-------------|-------------|-------------|--------------------|------------------|--------------|-----------|--------------|
| 1           | 1            | 0         | 0                 | 1           | 1           | 0           | 0                  | 1                | 0            | 0         | START        |
| 2           | 0            | 1         | 0                 | 1           | 1           | 0           | 0                  | 1                | 0            | 0         | G1           |
| 3           | 0            | 0         | 0                 | 0           | 0           | 0           | 0                  | 1                | 0            | 0         | G1/S         |
| 4           | 0            | 0         | 1                 | 0           | 0           | 0           | 0                  | 1                | 0            | 0         | G2           |
| 5           | 0            | 0         | 1                 | 0           | 0           | 0           | 0                  | 0                | 1            | 0         | G2           |
| 6           | 0            | 0         | 1                 | 0           | 0           | 0           | 1                  | 0                | 1            | 0         | G2/M         |
| 7           | 0            | 0         | 1                 | 0           | 0           | 1           | 1                  | 0                | 1            | 0         | G2/M         |
| 8           | 0            | 0         | 0                 | 0           | 0           | 1           | 0                  | 0                | 1            | 1         | M            |
| 9           | 0            | 0         | 0                 | 1           | 1           | 0           | 0                  | 1                | 0            | 1         | M            |
| 10          | 0            | 0         | 0                 | 1           | 1           | 0           | 0                  | 1                | 0            | 0         | G1           |
